# Supplementary material for: Bio-based polyurethane foam preparation employing lignin from corn stalk enzymatic hydrolysis residues
Source: Royal Society of Chemistry journal article supplement (doi:10.1039/c8ra01089g), 2018-01-01
Supplement: c8ra01089g1.pdf [file c8ra01089g1.pdf]

## Electronic Supplementary Information

Bio-based Polyurethane Foam Preparation Employing Lignin from Corn Stalk  
Enzymatic Hydrolysis Residues

*Shiyun Zhu,<sup>ab</sup> Kefu Chen,<sup>ab</sup> Jun Xu,<sup>\*ab</sup> Jun Li,<sup>a</sup> and Lihuan Mo<sup>a</sup>*

<sup>a</sup>State Key Laboratory of Pulp and Paper Engineering, South China University of  
Technology, Guangzhou 510640, Guangdong, China

<sup>b</sup>Plant Micro/Nano Fiber Research Center, South China University of Technology,  
Guangzhou 510640, Guangdong, China

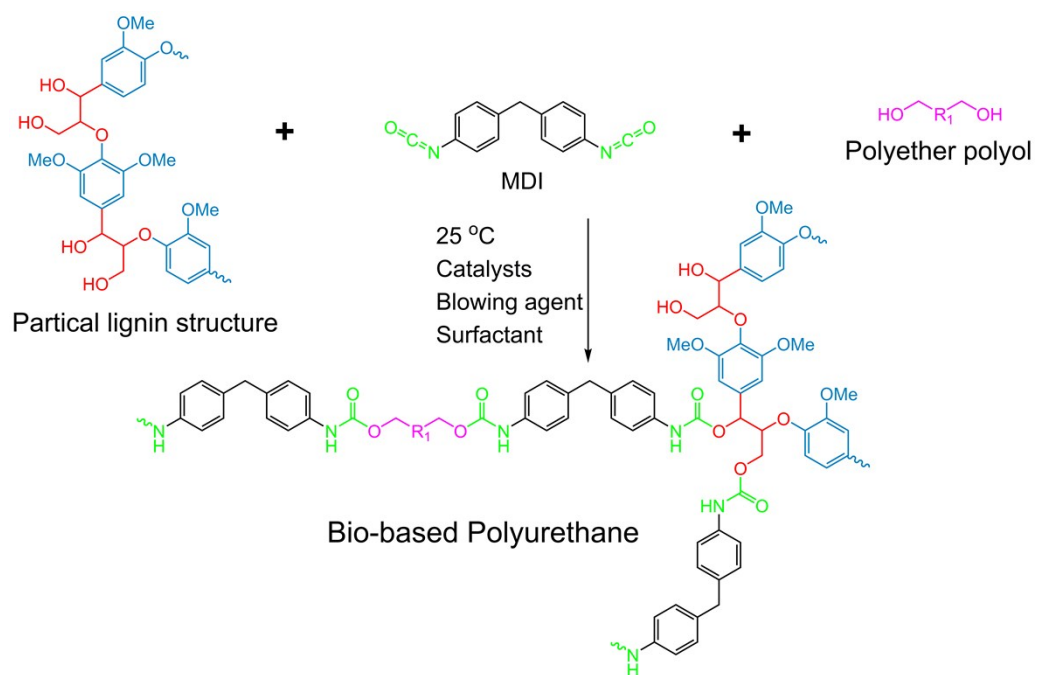

**Fig. S1** Reaction of the synthesis of BPU foams.

**Table S1** Experimental conditions of single factor

| factor           | Level |      |      |      |      |
|------------------|-------|------|------|------|------|
|                  | 1     | 2    | 3    | 4    | 5    |
| C(NaOH) (g/L)    | 20    | 30   | 40   | 50   | 60   |
| L-S ratio (mL/g) | 20:1  | 30:1 | 40:1 | 50:1 | 60:1 |
| Temperature(°C)  | 30    | 40   | 50   | 60   | 70   |
| Time (h)         | 1.5   | 2    | 2.5  | 3    | 3.5  |

**Table S2** Box-Behnken design for experiments

| Factor           | Number | Level |      |      |
|------------------|--------|-------|------|------|
|                  |        | -1    | 0    | 1    |
| C(NaOH) (g/L)    | A      | 30    | 40   | 50   |
| L-S ratio (mL/g) | B      | 30:1  | 40:1 | 50:1 |
| Temperature(°C)  | C      | 50    | 60   | 70   |
| Time (h)         | D      | 2     | 2.5  | 3    |

**Table S3** Experimental design and results of response surface

| Number | factor             |                    |             |      | Y/%   |
|--------|--------------------|--------------------|-------------|------|-------|
|        | NaOH concentration | liquid-solid ratio | temperature | time |       |
| 1      | -1                 | 0                  | 0           | 1    | 55.02 |
| 2      | 0                  | -1                 | 0           | -1   | 58.27 |
| 3      | 0                  | -1                 | 0           | 0    | 62.50 |
| 4      | -1                 | 0                  | 1           | 0    | 50.35 |
| 5      | -1                 | 0                  | -1          | 0    | 50.12 |
| 6      | 1                  | 1                  | 1           | 0    | 52.41 |
| 7      | 0                  | 0                  | -1          | -1   | 55.44 |
| 8      | 0                  | -1                 | 0           | 1    | 58.68 |
| 9      | 0                  | 0                  | 0           | 0    | 62.5  |
| 10     | 1                  | 0                  | 0           | 1    | 53.21 |
| 11     | 0                  | 1                  | -1          | 0    | 40.25 |
| 12     | 0                  | 0                  | 1           | -1   | 60.79 |
| 13     | 0                  | -1                 | -1          | 0    | 55.31 |
| 14     | 0                  | 0                  | -1          | 1    | 52.31 |
| 15     | 1                  | 0                  | 0           | 0    | 53.21 |
| 16     | -1                 | 1                  | 0           | -1   | 50.48 |
| 17     | 0                  | 1                  | 0           | 1    | 48.31 |
| 18     | -1                 | -1                 | 0           | 0    | 48.59 |
| 19     | 0                  | 0                  | 0           | 0    | 62.50 |
| 20     | -1                 | 0                  | 0           | -1   | 55.12 |
| 21     | 1                  | 0                  | 1           | 0    | 55.56 |
| 22     | 0                  | 0                  | 1           | 1    | 58.54 |
| 23     | 0                  | 0                  | 0           | 0    | 61.1  |
| 24     | 1                  | 1                  | 0           | 0    | 40.18 |
| 25     | 0                  | -1                 | 1           | 0    | 49.35 |
| 26     | 1                  | 0                  | -1          | 0    | 43.91 |
| 27     | 0                  | 1                  | 1           | 0    | 48.21 |
| 28     | 0                  | 0                  | 0           | 0    | 61.10 |
| 29     | 0                  | 1                  | 0           | -1   | 52.53 |
